# Supplementary material for: SARS-CoV-2 infection risk during delivery of childhood vaccination campaigns: a modelling study
Source: Springer Nature journal article supplement (doi:10.1186/s12916-021-02072-8), 2021-08-12
Supplement: MOESM1 [file 19565940]

# Supplementary Figures for “SARS-CoV-2 infection risk during delivery of childhood vaccination campaigns: a modelling study”

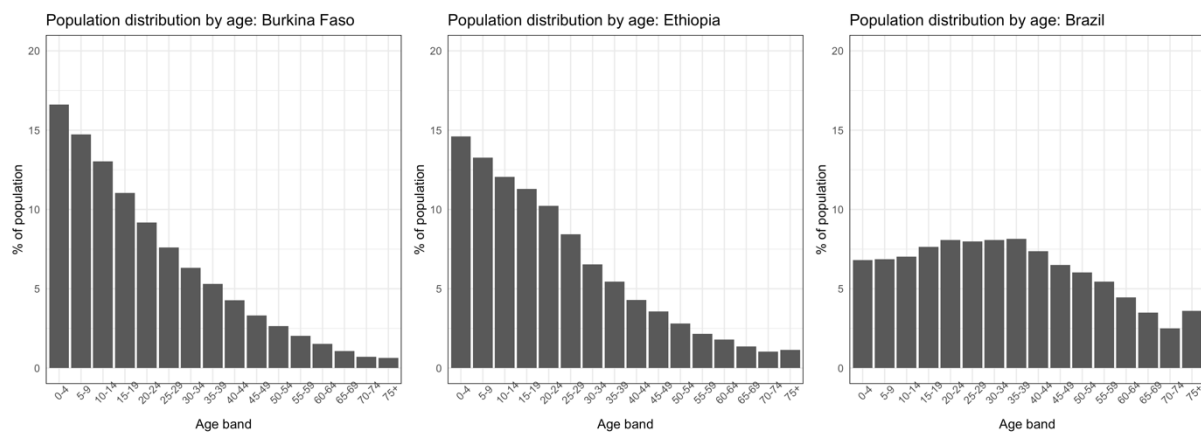

**Supplementary Figure 1. Population age distribution used to parameterise the transmission model**

## Country-specific contact matrices

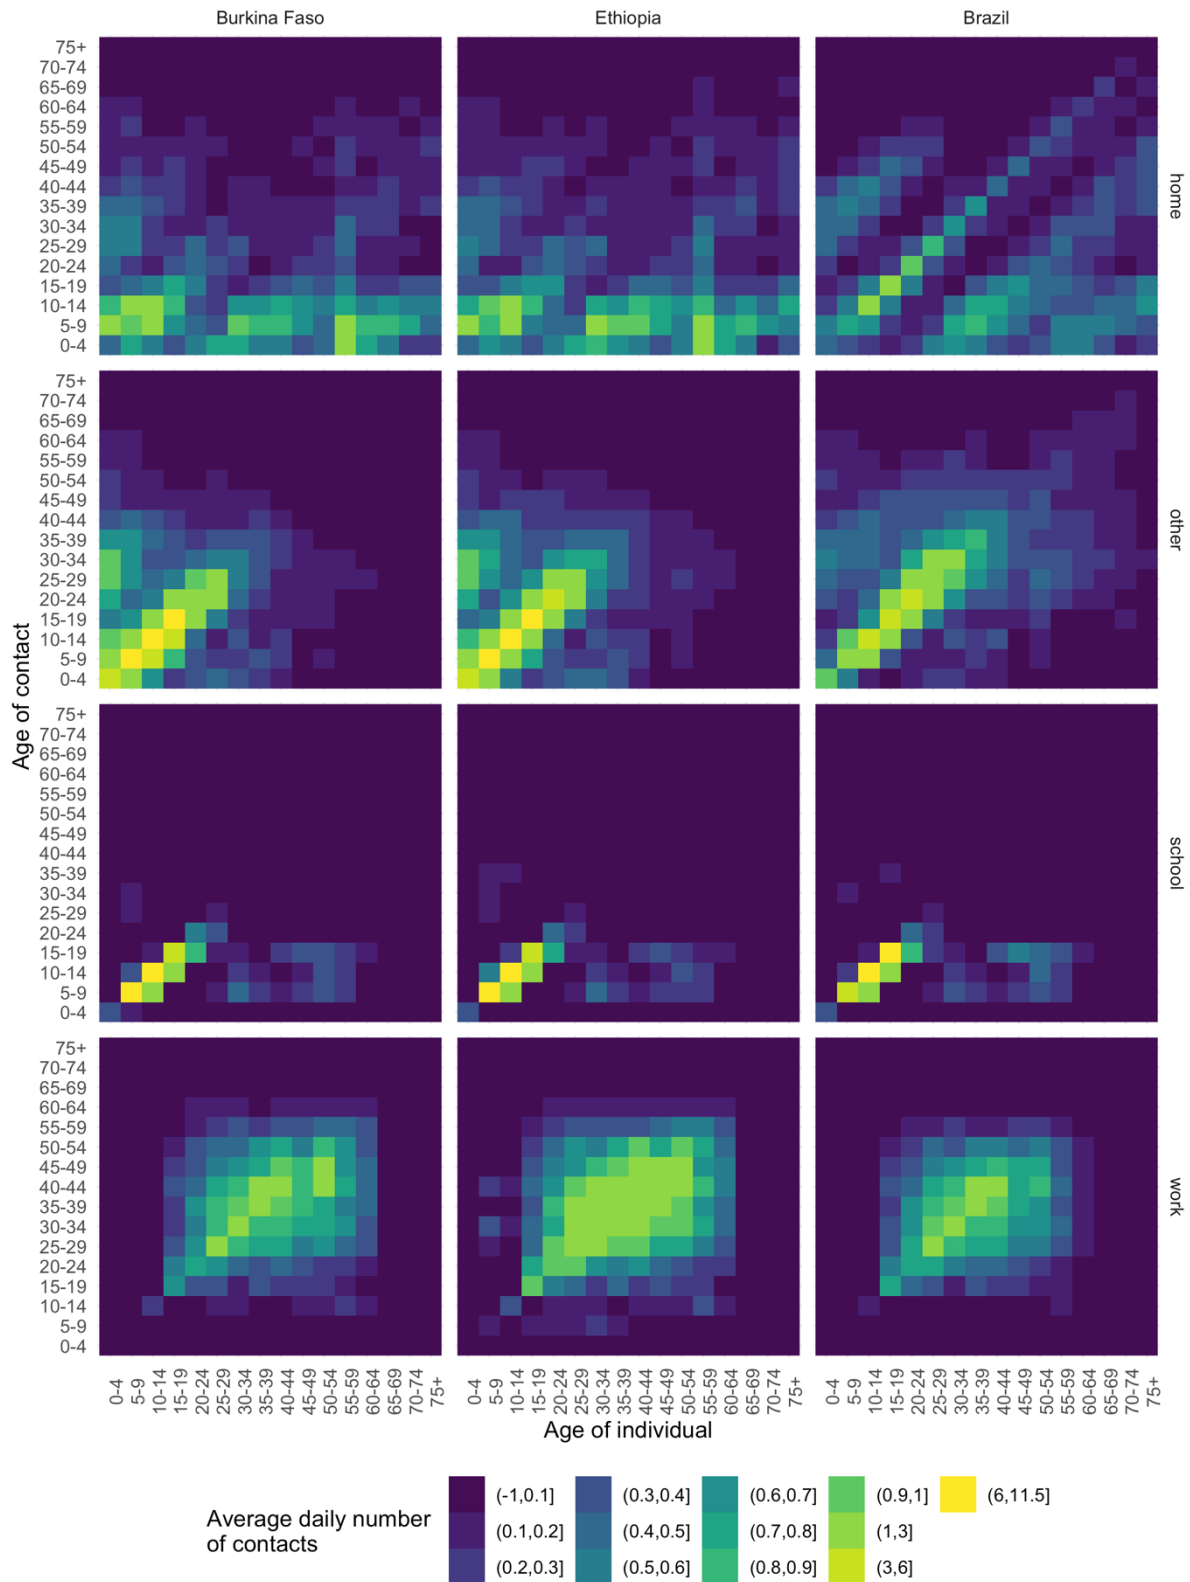

**Supplementary Figure 2. Baseline age-specific contact matrices from Prem et al. (prior to assumed reduction in non-household contacts) used to parameterise the transmission model**

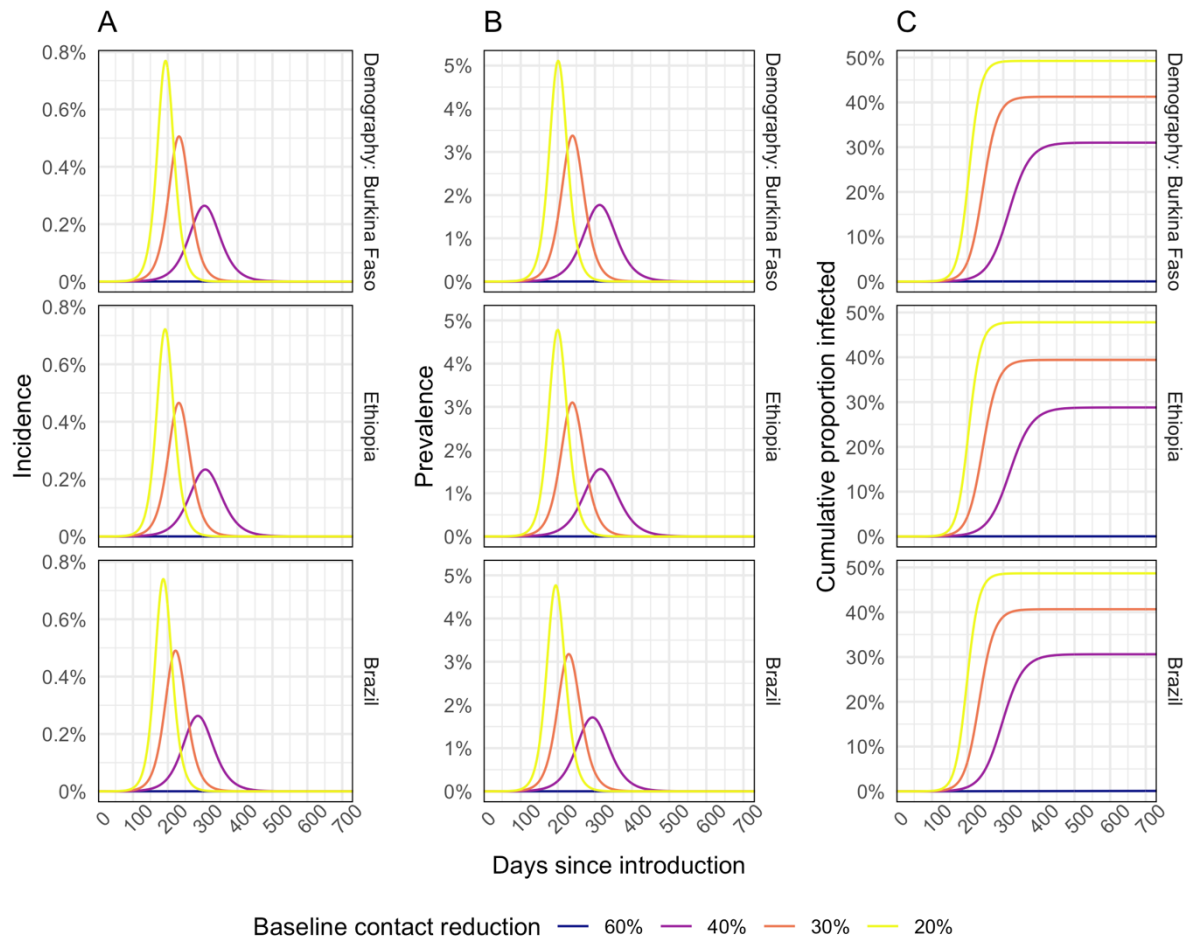

**Supplementary Figure 3. Modelled incidence (A), prevalence (B) and cumulative proportion of individuals infected (C) for an epidemic with  $R_0 = 2$  and assuming different % reductions in non-household contacts compared to baseline.** These simulations are used in two different sensitivity analyses: (i) using results for 30% and 20% reductions applied to vaccinators only to model the impact of faster epidemics amongst healthcare workers (Supplementary Figure 4); and (ii) using results for 60% and 20% reductions as a sensitivity analysis applied to the whole population.

### A - Excess risk to vaccinators

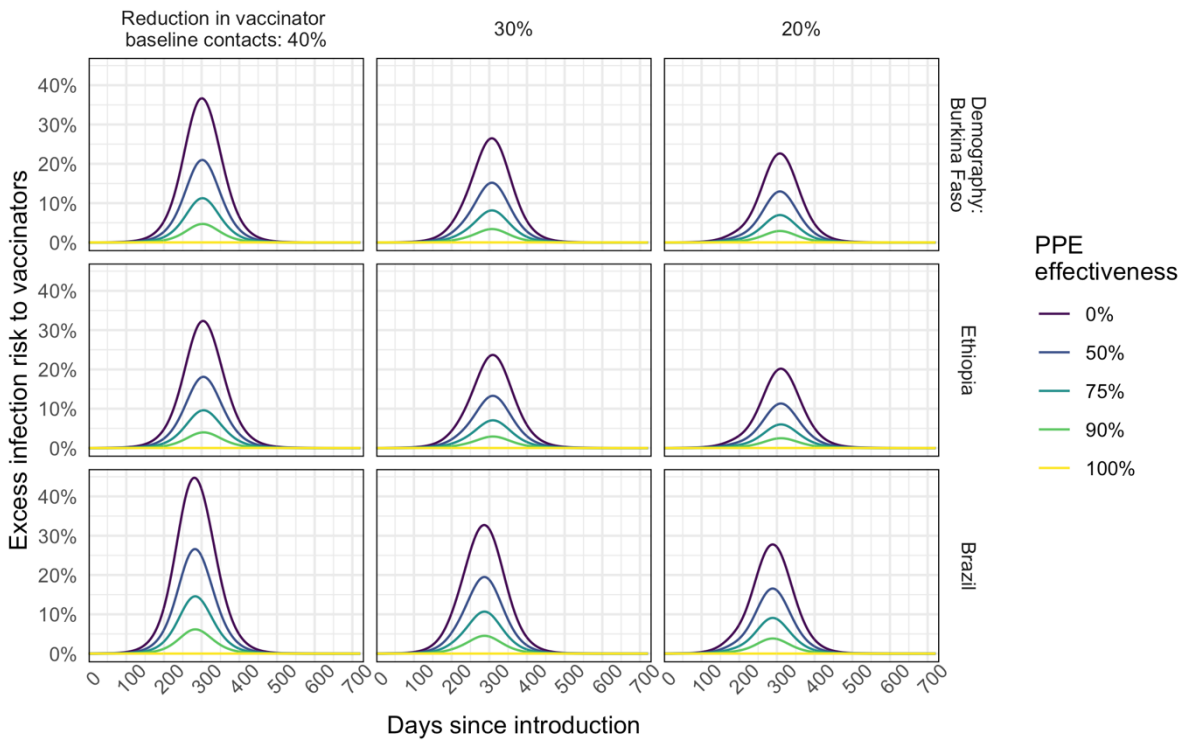

### B - Excess risk to vaccinees/caregivers

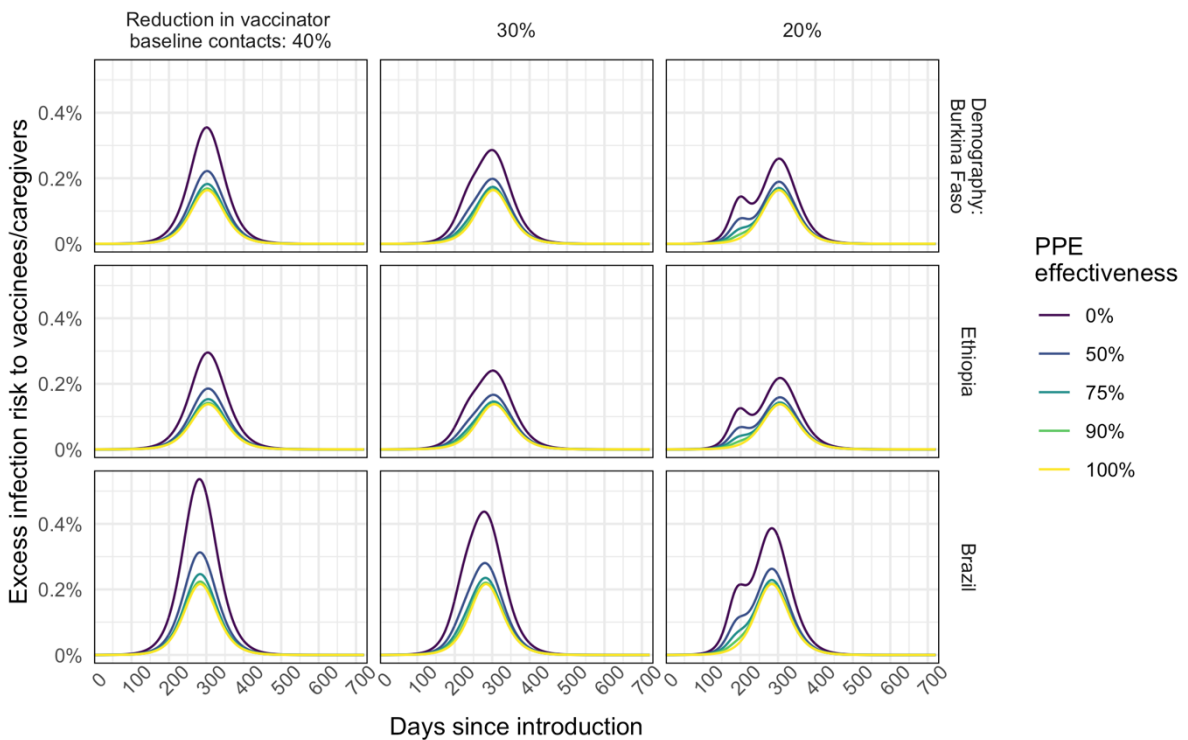

**Supplementary Figure 4. Excess infection risk for vaccinators (A) and children and/or caregivers (B) for scenarios in which vaccinators are assumed to experience a smaller reduction in non-household contacts compared to the general population.**

### A - Excess risk to vaccinators

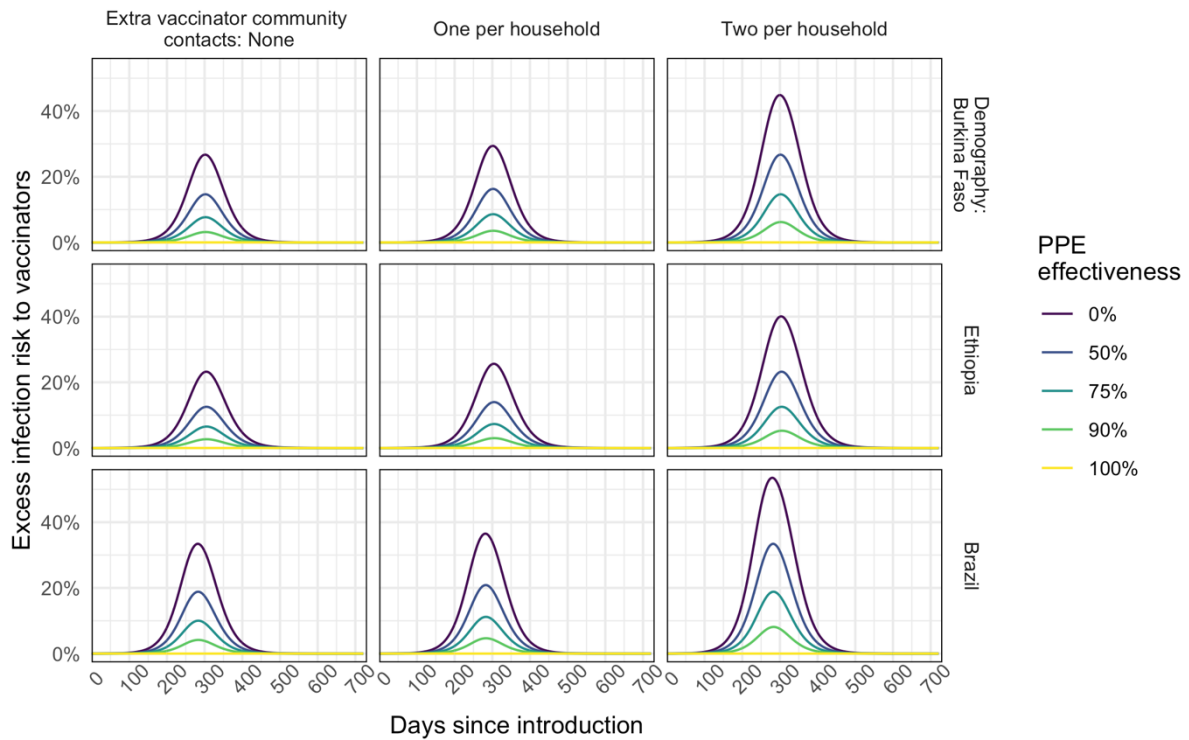

### B - Excess risk to vaccinees/caregivers

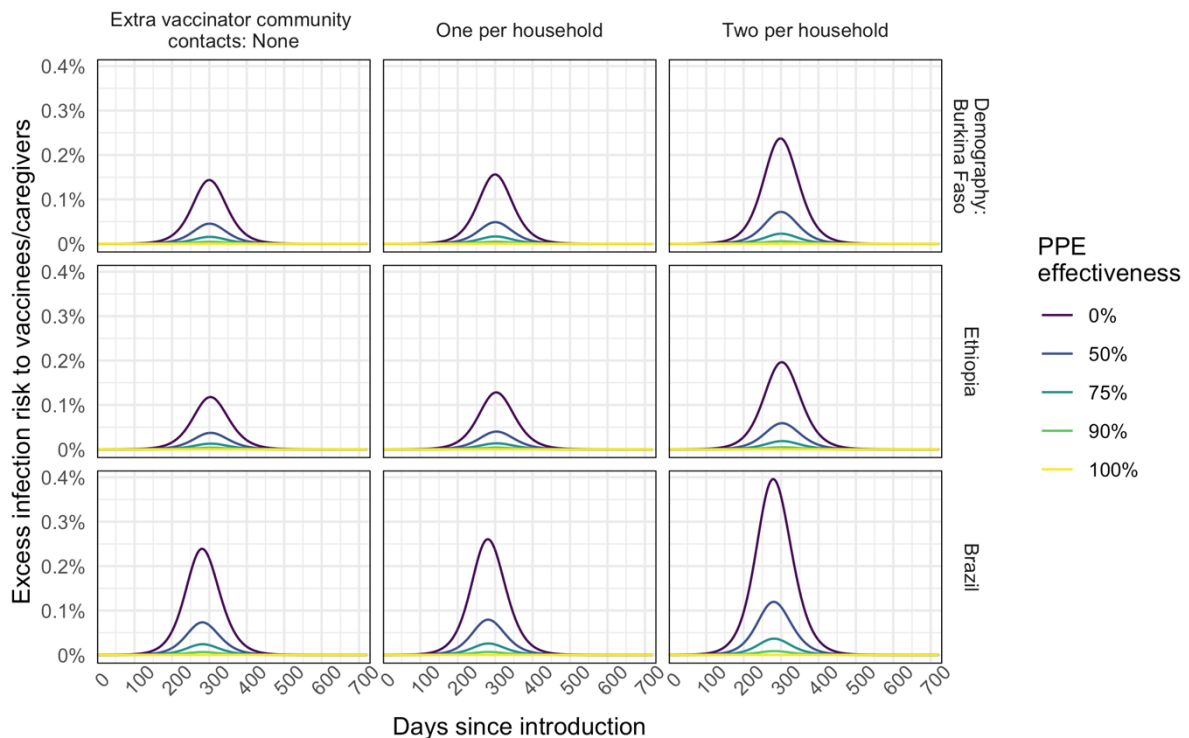

**Supplementary Figure 5. Modelled excess risk of (A) vaccinators and (B) vaccinees and/or caregivers becoming infected during house-to-house immunisation campaigns conducted at different times during the epidemic.** Results are shown for epidemics modelled using  $R_0=2$  and different assumptions about the number of additional community contacts made by vaccinators for each household visited. Line colour shows the impact of different levels of PPE effectiveness.

### A - Excess risk to vaccinators

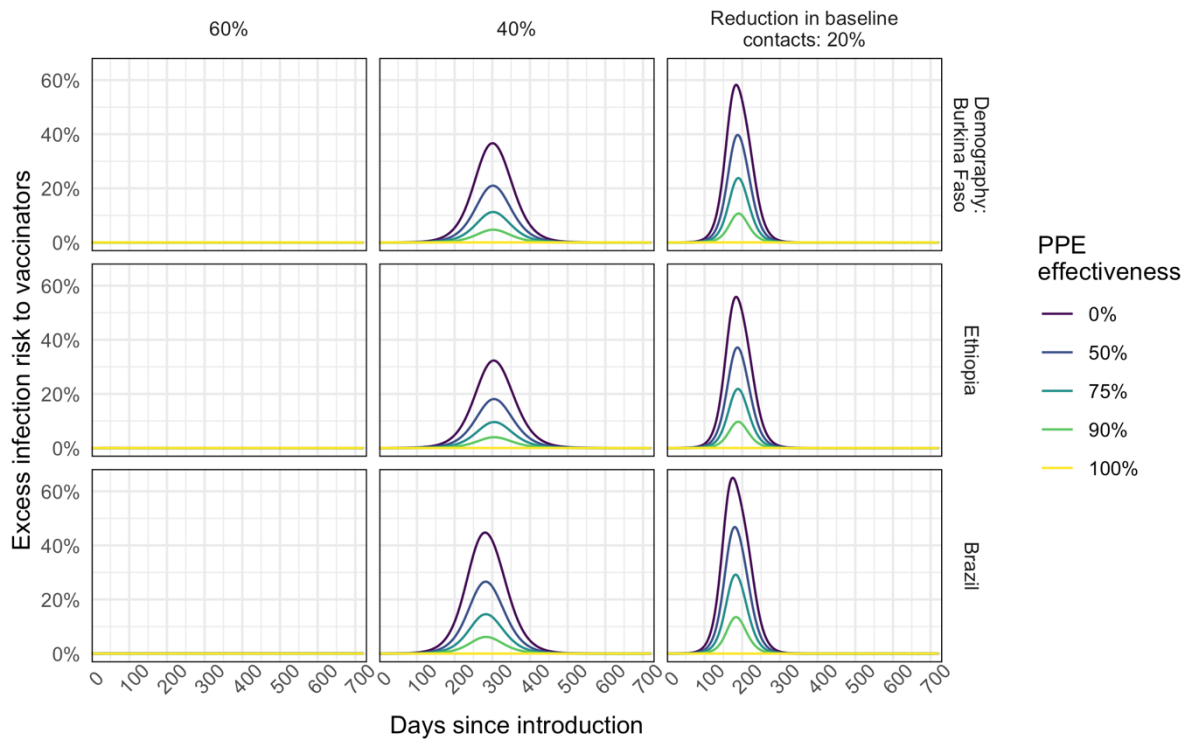

### B - Excess risk to vaccinees/caregivers

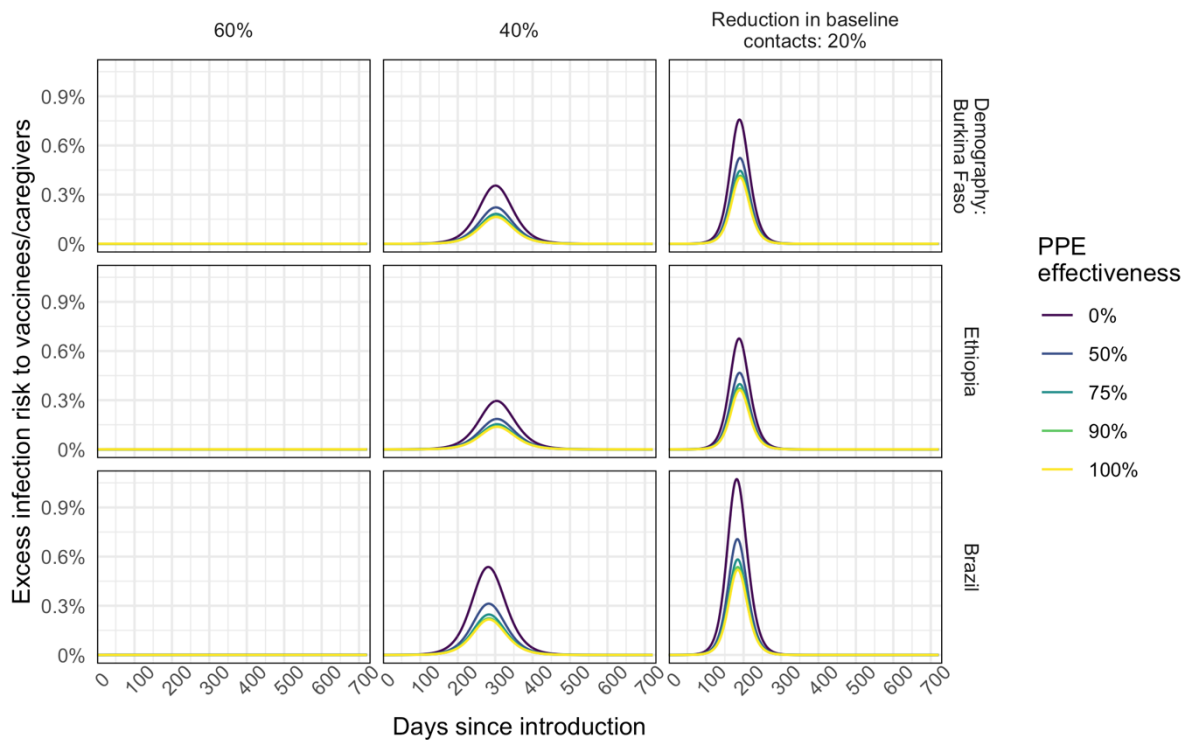

**Supplementary Figure 6. Modelled excess risk of (A) vaccinators and (B) vaccinees and/or caregivers becoming infected during fixed-post immunisation campaigns conducted at different times during the epidemic.** Results are shown for epidemics modelled using  $R_0=2$  and different assumptions about the level of reduction in non-household contacts due to NPIs. Line colour shows the impact of different levels of PPE effectiveness.
